# Supplementary material for: JMJD2C mediates the MDM2/p53/IL5RA axis to promote CDDP resistance in uveal melanoma
Source: PubMed Central journal article supplement (PMC9039082; doi:10.1038/s41420-022-00949-y), 2022-04-25
Supplement: 41420_2022_949_MOESM8_ESM.pdf [file 41420_2022_949_MOESM8_ESM.pdf]

Please complete the table below to indicate the contributions of all named authors to the figures.

Figure 1:

|  |
|--|
|  |
|--|

Figure 2:

|  |
|--|
|  |
|--|

Figure 3:

|  |
|--|
|  |
|--|

Figure 4:

|  |
|--|
|  |
|--|

Figure 5:

|  |
|--|
|  |
|--|

Figure 6:

|  |
|--|
|  |
|--|

Signed for and on behalf of the Author(s):

Hongtao Yan

Print Name:

|  |
|--|
|  |
|--|

Date:

|  |
|--|
|  |
|--|
